# Supplementary material
Source: PubMed Central journal article supplement (PMC7207033)
Supplement: supp_8.2.E313_2020-0043-1-at.pdf [file supp_8.2.E313_2020-0043-1-at.pdf]

## Appendix 1 (as supplied by the authors): Supplemental tables

Supplemental Table S1. Diagnosis codes used to define ambulatory sensitive conditions and hypo- or hyperglycemia.

| Condition                       | ICD-10 codes                                                                                                                                                                  |
|---------------------------------|-------------------------------------------------------------------------------------------------------------------------------------------------------------------------------|
| Ambulatory sensitive conditions | E10.1, E10.6, E10.7, E10.9, E11.0, E11.1, E11.6, E11.7, E11.9, E13.0, E13.1, E13.6, E13.7, E13.9, E14.0, E14.1, E14.6, E14.7, E14.9, I50.0, J41, J42, J43, J44, J45, J47, J81 |
| Hypo- or hyperglycemia          | E10.63, E11.0, E11.1, E11.63, E13.0, E13.1, E13.63, E14.0, E14.1, E14.63, E15, E16.0, E16.1, E16.2, R73, T38.3, Y42.3                                                         |

### Supplemental Table S2, part 1

| Outcome                                                         | First Nations overall |                  |                  |                  | First Nations living in First Nations communities |                  |                  |                  |
|-----------------------------------------------------------------|-----------------------|------------------|------------------|------------------|---------------------------------------------------|------------------|------------------|------------------|
|                                                                 | Urban                 | Semiurban        | Rural            | Remote           | Urban                                             | Semiurban        | Rural            | Remote           |
| With a regular family physician (%; CI)                         | 89.8 (87-92.6)        | 90.9 (87.9-94.1) | 86.4 (83.6-89.4) | 75.3 (72.9-77.8) | 86.7 (76.9-97.3)                                  | 88.8 (82.9-95.1) | 81.1 (76.9-85.5) | 72.6 (69.8-75.4) |
| Continuity of care with the regular family physician (mean; CI) | 71.3 (70.4-72.2)      | 80.9 (79.9-81.8) | 73.8 (72.7-74.8) | 74.1 (73.1-75.2) | 81.4 (78.0-84.9)                                  | 83.5 (81.5-85.4) | 77.6 (76.1-79.1) | 76.5 (75.3-77.6) |
| Receiving care from an endocrinologist (%; CI)                  | 6.8 (6.1-7.6)         | 4.1 (3.5-4.8)    | 2.2 (1.8-2.7)    | 2.3 (1.9-2.8)    | 2.5 (1.4-4.3)                                     | 3.5 (2.4-4.9)    | 1.9 (1.3-2.7)    | 2.0 (1.6-2.5)    |
| Receiving care from a general internist (%; CI)                 | 13.0 (11.9-14.1)      | 11.1 (10.0-12.2) | 7.0 (6.2-7.9)    | 7.0 (6.3-7.8)    | 12.6 (8.8-17.3)                                   | 10.9 (8.8-13.3)  | 7.2 (5.9-8.7)    | 6.4 (5.6-7.3)    |
| Hospitalized for ambulatory care sensitive conditions (%; CI)   | 2.3 (1.9-2.8)         | 2.0 (1.6-2.5)    | 2.8 (2.3-3.3)    | 2.6 (2.1-3.1)    | 1.5 (0.6-3.1)                                     | 1.7 (1.0-2.9)    | 3.0 (2.2-3.9)    | 2.6 (2.0-3.2)    |
| Emergency department visit for hypo/hyperglycemia (%; CI)       | 1.5 (1.2-1.8)         | 1.9 (1.5-2.4)    | 1.5 (1.2-1.9)    | 1.2 (0.9-1.5)    | 0.2 (0.0-1.3)                                     | 0.8 (0.4-1.5)    | 1.4 (1.0-2.0)    | 1.0 (0.7-1.4)    |

**Supplemental Table S2, part 2**

| Outcome                                                         | First Nations living outside First Nations communities |                  |                  |                  | Other people in Ontario |                  |                  |                  |
|-----------------------------------------------------------------|--------------------------------------------------------|------------------|------------------|------------------|-------------------------|------------------|------------------|------------------|
|                                                                 | Urban                                                  | Semiurban        | Rural            | Remote           | Urban                   | Semiurban        | Rural            | Remote           |
| With a regular family physician (%; CI)                         | 90.1 (87.2-93.0)                                       | 91.6 (88.1-95.3) | 90.7 (86.8-94.7) | 84.9 (79.5-90.6) | 98.0 (97.8-98.2)        | 97.3 (96.9-97.7) | 95.9 (95.3-96.5) | 91.6 (88.6-94.7) |
| Continuity of care with the regular family physician (mean, CI) | 70.7 (69.8-71.6)                                       | 80.1 (79.0-81.1) | 71.1 (69.7-72.5) | 67.1 (64.9-69.3) | 76.4 (76.3-76.4)        | 81.5 (81.4-81.6) | 80.8 (80.7-81.0) | 77.4 (76.3-78.4) |
| Receiving care from an endocrinologist (%; CI)                  | 7.2 (6.4-8.0)                                          | 4.3 (3.6-5.1)    | 2.4 (1.8-3.1)    | 3.5 (2.5-4.8)    | 10.8 (10.7-10.9)        | 6.6 (6.5-6.7)    | 5.4 (5.2-5.6)    | 3.4 (2.8-4.0)    |
| Receiving care from a general internist (%; CI)                 | 12.9 (11.8-14.1)                                       | 11.1 (9.9-12.5)  | 6.8 (5.7-7.9)    | 9.0 (7.3-10.9)   | 10.7 (10.6-10.8)        | 12.4 (12.3-12.6) | 9.9 (9.7-10.1)   | 7.7 (6.9-8.6)    |
| Hospitalized for ambulatory care sensitive conditions (%; CI)   | 2.4 (2.0-2.9)                                          | 2.1 (1.6-2.7)    | 2.6 (1.9-3.3)    | 2.6 (1.8-3.8)    | 1.1 (1.1-1.1)           | 1.4 (1.4-1.5)    | 1.6 (1.5-1.7)    | 1.6 (1.2-2.1)    |
| Emergency department visit for hypo/hyperglycemia (%; CI)       | 1.5 (1.2-1.9)                                          | 2.2 (1.7-2.8)    | 1.6 (1.1-2.1)    | 1.8 (1.1-2.6)    | 0.8 (0.7-0.8)           | 1.1 (1.0-1.1)    | 1.2 (1.1-1.2)    | 0.7 (0.5-1.1)    |
