# Supplementary material
Source: PubMed Central journal article supplement (PMC7207033)
Supplement: supp_8.2.E313_2020-0043-original-submission.pdf [file supp_8.2.E313_2020-0043-original-submission.pdf]

# Utilization of the healthcare system by Ontario First Nations people with diabetes: a population-based study

Baiju R Shah MD PhD<sup>1,2,3</sup>

Morgan Slater PhD<sup>1,7</sup>

Eliot Frymire MA BEd<sup>1,4</sup>

Kristen Jacklin PhD<sup>5</sup>

Roseanne Sutherland<sup>6</sup>

Shahriar Khan MSc<sup>1,4</sup>

Jennifer D Walker PhD<sup>1,8</sup>

Michael E Green MD MPH<sup>1,4,7,9</sup>

<sup>1</sup> ICES, Toronto, Ontario

<sup>2</sup> Division of Endocrinology, Sunnybrook Health Sciences Centre, Toronto, Ontario

<sup>3</sup> Department of Medicine, University of Toronto, Ontario

<sup>4</sup> Health Services and Policy Research Institute, Queen's University, Kingston, Ontario

<sup>5</sup> Memory Keeper's Medical Discovery Team, Department of Family Medicine and Biobehavioral Health, University of Minnesota Medical School, Duluth

<sup>6</sup> Chiefs of Ontario, Toronto, Ontario

<sup>7</sup> Department of Family Medicine, Queen's University, Kingston, Ontario

<sup>8</sup> School of Rural and Northern Health, Laurentian University, Sudbury, Ontario

<sup>9</sup> Department of Family Medicine, Kingston Health Sciences Centre

Correspondence to: Baiju R Shah, Sunnybrook Health Sciences Centre, G106 – 2075 Bayview Avenue, Toronto M4N 3M5. baiju.shah@ices.on.ca, tel 416-480-4706, fax 416-480-6048

1  
2  
3  
4  
5  
6  
7  
8  
9  
10  
11  
12  
13  
14  
15  
16  
17  
18  
19  
20  
21  
22  
23  
24  
25  
26  
27  
28  
29  
30  
31  
32  
33  
34  
35  
36  
37  
38  
39  
40  
41  
42  
43  
44  
45  
46  
47  
48  
49  
50  
51  
52  
53  
54  
55  
56  
57  
58  
59  
60

Funding: This study was support by an Ontario SPOR Support Unit IMPACT Award. Additional support was provided by Dr. Green through the Brian Hennen Chair in Family Medicine, Dr. Walker through a Tier 2 Canada Research Chair in Indigenous Health, and ICES. ICES is funded by an annual grant from the Ontario Ministry of Health and Long-Term Care (MOHLTC).

Competing Interests: none to declare

Confidential

## Abstract

Background: First Nations people have an increased prevalence of diabetes compared to other residents of Ontario. This study examined utilization of healthcare services by people with diabetes, comparing First Nations people with other people in Ontario.

Methods: Using healthcare administrative databases, we identified all people in Ontario diagnosed with diabetes as of April 1 2014. We identified First Nations people using the Indian Register, and further separated them into those living in or outside of First Nations communities. We determined the proportion of patients with a regular family physician, and their continuity of care with that physician. We also examined visits with an endocrinologist or general internist, hospitalizations for ambulatory care sensitive conditions, and emergency department visits for hypo- or hyperglycemia.

Results: First Nations people, particularly those living in First Nations communities, were less likely to have a regular family physician, had lower continuity of care with that physician, and were less likely to see diabetes specialists. First Nations people also had more hospitalizations for ambulatory care sensitive conditions and more emergency department visits for hypo- or hyperglycemia.

Interpretation: First Nations people with diabetes in Ontario are less likely to have a regular family physician or to see a specialist than other people in Ontario. Higher rates of hospitalizations for ambulatory care sensitive conditions and emergency department visits for hypo- or hyperglycemia are also indicators of poor access to adequate primary care. These findings may help explain continued disparities in the rates of complications related to diabetes.

## Introduction

Healthcare systems with strong primary care deliver better outcomes at lower costs and with fewer disparities, (1),(2) particularly among people with chronic diseases such as diabetes. (3) First Nations people in Ontario have an increased prevalence of diabetes compared to other people in the province, (4) and experience complications from diabetes at elevated rates. (5) First Nations people also face unique geographic and socio-political barriers to diabetes care. Colonialism is a major contributor to socioeconomic and environmental marginalization, geographic and transportation barriers, and the fragmentation of responsibility for healthcare services. (6),(7),(8) Racism, discrimination, unconscious bias and structural violence in the health care system also create barriers that keeps Indigenous people from accessing healthcare services. (9),(10),(11),(12) The objective of this study was to compare health service utilization by First Nations people with diabetes with other people in Ontario with diabetes.

## Methods

ICES maintains comprehensive linked administrative datasets related to Ontario's single payer publicly funded healthcare system. The general approach to cohort creation, description of the major data sets used and a description of the characteristics of the study cohort are described in detail elsewhere. (13) In brief, we examined all individuals with diagnosed diabetes in Ontario as of April 1 2014, and identified those who were First Nations using the Indian Register. First Nations people were also divided into those who lived in or outside First Nations communities ("Indian Reserves") using postal codes and other geographic information. (13) Healthcare utilization outcomes were ascertained using physician service claims for fee-for-service reimbursement, and from hospital discharge abstracts compiled by the Canadian Institute of Health Information.

1  
2  
3 We determined the proportion of people with diabetes who had a regular family physician by  
4 examining their registrations to a family physician under a primary care enrolment model, where  
5 patients are rostered with a specific family physician or team. For people who were not formally  
6 rostered, we considered them to have a regular family physician if they had received any core  
7 primary care services over the preceding 2 years. (14) Among those patients with diabetes who  
8 had a regular family physician and who had at least 3 family physician visits over the preceding  
9 2 years, we determined their continuity of primary care by calculating the proportion of their  
10 family physician visits that were with their regular family physician. We then ascertained three  
11 healthcare utilization outcomes over a 1-year period, from April 1 2014 to March 31 2015. The  
12 first was ambulatory visits with an endocrinologist or a general internist. The second was  
13 hospitalization for an ambulatory care sensitive condition (asthma, chronic obstructive  
14 pulmonary disease, congestive heart failure or diabetes). Ambulatory care sensitive conditions  
15 are chronic medical conditions for which adequate and timely primary care ought to reduce the  
16 requirement for hospitalization for these conditions. (15),(16) Hospitalizations for these  
17 conditions are potentially preventable, and so can be considered a marker of poor access to or  
18 quality of primary care. Finally, the third was emergency department visit for hypo- or  
19 hyperglycemia. These are an acute complication of diabetes, as they indicate a patient with  
20 such profound metabolic abnormalities that they could not self-manage and instead required  
21 medical assistance. We restricted these to unplanned emergency department visits and those  
22 with triaged with a score of “urgent” or higher, to exclude emergency department visits that were  
23 substitutes for primary care visits (e.g., prescription renewals or scheduled follow-up with a  
24 family physician working an emergency department shift).

25  
26  
27  
28  
29  
30  
31  
32  
33  
34  
35  
36  
37  
38  
39  
40  
41  
42  
43  
44  
45  
46  
47  
48  
49  
50 All outcomes were age- and sex-adjusted. Analyses were conducted using SAS Enterprise  
51 Guide version 7.1 (Cary, NC). The project was approved by the Chiefs of Ontario Data  
52  
53  
54  
55  
56  
57  
58  
59  
60

1  
2  
3 Governance Committee. The study received research ethics review from Queen's University  
4 and Laurentian University.  
5  
6  
7

## 8 **Results**

9

10  
11 There were 1,380,529 people diagnosed with diabetes in Ontario, of whom 22,952 (1.7%) were  
12 First Nations people. Table 1 shows the baseline characteristics of these populations. On  
13 average, First Nations people with diabetes were younger and more often female than other  
14 people in Ontario with diabetes. They are also more likely to reside in rural and remote areas.  
15  
16  
17  
18  
19

20  
21 Figure 1 shows the proportion of people with a regular family physician. First Nations people,  
22 particularly those who lived in First Nations communities, were less likely to have a regular  
23 family physician than other people in Ontario. First Nations people living in First Nations  
24 communities received 54.4% of their primary care from their usual provider, compared to 64.5%  
25 for First Nations people living outside of First Nations communities and 74.1% of other people in  
26 Ontario. Likewise, First Nations people with diabetes, especially those who lived in First Nations  
27 communities, were less likely to receive care from endocrinologists or general internists than  
28 other people in Ontario (Figure 2). Only 9.3% of other people in Ontario with diabetes saw an  
29 endocrinologist, whereas only 2.1% of First Nations people living in First Nations communities  
30 did.  
31  
32  
33  
34  
35  
36  
37  
38  
39  
40  
41  
42

43  
44 First Nations people with diabetes had more than double the rate of hospitalization for  
45 ambulatory care sensitive conditions compared to other people with diabetes in Ontario (Figure  
46 3). Emergency department visits for hypo- or hyperglycemia were infrequent, but occurred more  
47 commonly in First Nations people than other people in Ontario (Figure 4). Both of these  
48 measures were more common among First Nations people living outside of rather than in First  
49 Nations communities.  
50  
51  
52  
53  
54  
55  
56  
57  
58  
59  
60

## Interpretation

1  
2  
3  
4  
5  
6  
7 First Nations people with diabetes were less likely to have a family physician compared to other  
8 people with diabetes in Ontario. As primary care plays an important role in overall health, the  
9 fact that nearly one-quarter of First Nations people with diabetes living in First Nations  
10 communities do not have a family physician is concerning. However, it is important to highlight  
11 that primary care delivered at Community Health Centres and Aboriginal Health Access Centres  
12 (where physicians do not submit fee-for-service claims), or through federally-funded nursing  
13 stations and health centres, was not captured within the data sources used in this study. Thus,  
14 our results likely underestimate the proportion of First Nations people who are receiving regular  
15 primary care. Patients who do not have regular primary care have been shown to have poorer  
16 quality of diabetes care and lower screening rates. (17),(18) Even among people who have a  
17 regular family physician, continuity of care was substantially lower for First Nations people with  
18 diabetes, especially those living in First Nations communities. Continuity is an essential part of  
19 high-quality care, (19) so these findings suggest First Nations people may be at increased risk  
20 for poor quality care.  
21  
22  
23  
24  
25  
26  
27  
28  
29  
30  
31  
32  
33  
34  
35  
36

37 First Nations people with diabetes were also less likely to receive specialist physician care,  
38 especially if they lived in First Nations communities. Since specialist physicians, particularly  
39 endocrinologists, are concentrated in larger urban centres, the unique geography of many First  
40 Nations communities may exacerbate this gap. However, it may also reflect systemic barriers to  
41 accessing specialized care for First Nations people. This gap in access to specialty care has  
42 been reported in other studies of diabetes in First Nations populations, (20) as well as in studies  
43 of other chronic conditions. (21),(22),(23)  
44  
45  
46  
47  
48  
49  
50  
51  
52

53 Hospitalizations for ambulatory care-sensitive conditions are a measure of primary healthcare  
54 performance. (15),(16) First Nations people with diabetes in Ontario had higher rates of  
55  
56  
57  
58  
59  
60

1  
2  
3 hospitalization for these conditions compared to other people in Ontario. This difference has  
4  
5 been previously documented in First Nations people in Ontario and in other Canadian  
6  
7 provinces, (20),(24),(25) and in the Métis. (26) Lavoie et al. (25) found that First Nations  
8  
9 communities in Manitoba with better access to community-level primary healthcare (i.e., nursing  
10  
11 stations) had lower rates of hospitalizations for ambulatory care sensitive conditions, whereas  
12  
13 communities with limited access to primary healthcare services within the community had higher  
14  
15 hospital admission rates. First Nations people with diabetes also had higher rates of emergency  
16  
17 department visits for hypo- or hyperglycemia. Although the vast majority of hypo- and  
18  
19 hyperglycemic events can be managed by patients themselves outside of acute care settings,  
20  
21 these findings suggest that First Nations people are at particularly increased risk for severe  
22  
23 metabolic abnormalities where they were unable to self-manage. Furthermore, many First  
24  
25 Nations people live in communities that are remote from hospitals, where nursing stations or  
26  
27 other healthcare facilities are the only available source of acute care. Thus, these data may  
28  
29 underestimate the true burden of acute metabolic complications among First Nations people in  
30  
31 Ontario. Our findings corroborate previous research in Ontario. (27) A recent qualitative study of  
32  
33 healthcare experiences of Indigenous people with type 2 diabetes found that visits to clinics  
34  
35 outside of their First Nation communities were considered a considerable challenge, not only  
36  
37 because of geographic isolation, but also because the shortage of physicians in First Nations  
38  
39 communities significantly jeopardized continuity of care. (9) Both of these indicators were less  
40  
41 common for First Nations people living in First Nations communities compared to living outside  
42  
43 of First Nations communities. This may reflect either that primary care resources (physicians,  
44  
45 nurses, other healthcare providers) are more readily available and accessible within First  
46  
47 Nations communities to prevent these events, or that access to hospitals is more difficult from  
48  
49 First Nations communities so patients who would otherwise be admitted or sent to the  
50  
51 emergency department are instead managed in the outpatient setting, out of necessity.  
52  
53  
54  
55  
56  
57  
58  
59  
60



1  
2  
3 This study had many important strengths, including that it was a participatory research  
4 collaboration between academic researchers and First Nations community members, who were  
5 involved through the inception, design and interpretation of the study. However, there are some  
6 important limitations in the data to note. As discussed above, we were unable to capture primary  
7 care services delivered by physicians or nurses at Community Health Centres and Aboriginal  
8 Health Access Centres, or through federally-funded facilities; hence, we may be over-estimating  
9 gaps in primary care between First Nations and other people in Ontario. In addition, any  
10 specialist care delivered outside of Ontario was not captured. This may particularly impact First  
11 Nations people living in northwestern Ontario, who may travel to Winnipeg, Manitoba for  
12 specialist care.  
13  
14  
15  
16  
17  
18  
19  
20  
21  
22  
23  
24

25 In conclusion, First Nations people in Ontario with diabetes are less likely to have a regular  
26 family physician, have lower continuity of care, and are less likely to see a diabetes specialist.  
27 They also had higher rates of hospitalization for ambulatory care sensitive conditions and higher  
28 rates of emergency department visits for hypo- or hyperglycemia, both of which are indicators of  
29 poor access to primary care. Some of these differences between First Nations people and other  
30 people in Ontario may result from geographical issues: for example, many First Nations  
31 communities are isolated and remote, where access to healthcare services, particularly  
32 specialized services, is difficult. However, it is important to highlight the continuing impact of  
33 colonization as a key barrier to healthcare access. (9),(28),(29) Because of this, First Nations  
34 people may be sensitive to power imbalances in their interactions with healthcare service  
35 providers, (30) and miscommunication is a large barrier to care. (31),(32) Inequities in access to  
36 healthcare can be improved by implementing models of care that embrace Indigenous  
37 knowledge systems and that acknowledge the social and historical context of First Nations  
38 people's health. (9),(30),(33),(34) Improvements to healthcare access and utilization are  
39 essential to reduce the burden of diabetes and its complications among First Nations people.  
40  
41  
42  
43  
44  
45  
46  
47  
48  
49  
50  
51  
52  
53  
54  
55  
56  
57  
58  
59  
60

## Acknowledgements

Our partner through the early design, implementation and final dissemination of this project is the Chiefs of Ontario. Their many member contributions were key to the content and quality of the project. The authors also acknowledge the members of the Patient Advisory Committee for providing insightful and thoughtful input; their advice made a significant contribution in shaping the work. For a complete listing of the specific members of the Committee, see [insert ICES Atlas citation]. We also wish to acknowledge the First Nations individuals from Big Grassy River, Alderville First Nation, Caldwell First Nation, Six Nations of the Grand River and Moose Cree First Nation living with diabetes who shared their personal experiences. The authors would also like to thank Sue Schultz and Rahim Moineddin for their contributions.

Parts of this material are based on data and information compiled and provided by: MOHLTC, Cancer Care Ontario, and the Canadian Institute of Health Information. The analyses, conclusions, opinions and statements expressed herein are solely those of the authors and do not reflect those of the funding or data sources; no endorsement is intended or should be inferred.

## References

- 1 Starfield B, Shi L, Macinko J. Contribution of primary care to health systems and health. *The Milbank Quarterly* 2005;83(3):457-502.
- 2 Friedberg MW, Hussey PS, Schneider EC. Primary care: a critical review of the evidence on quality and costs of health care. *Health Aff* 2010;29(5):766-72.
- 3 Hansen J, Groenewegen PP, Boerma WGW, Kringos DS. Living in a country with a strong primary care system is beneficial to people with chronic conditions. *Health Aff* 2015;34(9):1531-7.

- 1  
2  
3 4 Walker JD. Diabetes prevalence and incidence in First Nations people in Ontario: a cohort  
4 study using linked administrative data. CMAJ 2019;Under review.  
5  
6  
7  
8 5 Green ME, Jones C, Walker JD, Shah BR, Khan S, Slater M, et al. First Nations and  
9 Diabetes in Ontario. Toronto, ON: ICES; 2019.  
10  
11  
12  
13 6 Richmond CAM, Ross NA. The determinants of First Nation and Inuit health: A critical  
14 population health approach. Health & Place 2009;15(2):403-11.  
15  
16  
17  
18 7 Reading CL, Wien F. Health inequalities and social determinants of Aboriginal People's  
19 health. Prince George, BC: National Collaborating Centre for Aboriginal Health; 2013.  
20  
21  
22  
23 8 Greenwood M, de Leeuw S, Lindsay N. Challenges in health equity for Indigenous peoples  
24 in Canada. Lancet 2018;391(10131):1645-8.  
25  
26  
27  
28 9 Jacklin KM, Henderson RI, Green ME, Walker LM, Calam B, Crowshoe LJ. Health care  
29 experiences of Indigenous people living with type 2 diabetes in Canada. CMAJ  
30 2017;189(3):E106.  
31  
32  
33  
34  
35  
36 10 Allan B, Smylie J. First Peoples, second class treatment: The role of racism in the health  
37 and well-being of Indigenous peoples in Canada. Toronto: The Wellesley Institute; 2015.  
38  
39  
40  
41 11 Walls ML, Gonzalez J, Gladney T, Onello E. Unconscious biases: racial microaggressions  
42 in American Indian health care. J Am Board Fam Med 2015;28(2):231-9.  
43  
44  
45  
46 12 Browne AJ. Clinical encounters between nurses and First Nations women in a Western  
47 Canadian hospital. Soc Sci Med 2007;64(10):2165-76.  
48  
49  
50  
51 13 Slater M. Reducing the burden of diabetes in First Nations people in Ontario: methods for  
52 a longitudinal population-based cohort study. CMAJ Open 2019;Under review.  
53  
54  
55  
56  
57  
58  
59  
60

- 1  
2  
3 14 Stukel TA, Glazier RH, Schultz SE, Guan J, Zagorski BM, Gozdyra P, et al. Multispecialty  
4 physician networks in Ontario. *Open Medicine* 2013;7(2):e40-e55.  
5  
6  
7  
8 15 Caper P. The microanatomy of health care. *Health Aff* 1993;12(1):174-7.  
9  
10  
11 16 Rosano A, Loha CA, Falvo R, van der Zee J, Ricciardi W, Guasticchi G, et al. The  
12 relationship between avoidable hospitalization and accessibility to primary care: a  
13 systematic review. *Eur J Public Health* 2012;23(3):356-60.  
14  
15  
16  
17  
18 17 Kiran T, Victor JC, Kopp A, Shah BR, Glazier RH. The relationship between primary care  
19 models and processes of diabetes care in Ontario. *Can J Diabetes* 2014;38(3):172-8.  
20  
21  
22  
23  
24 18 Kiran T, Kopp A, Glazier RH. Those left behind from voluntary medical home reforms in  
25 Ontario, Canada. *Ann Fam Med* 2016;14(6):517-25.  
26  
27  
28  
29 19 van Walraven C, Oake N, Jennings A, Forster AJ. The association between continuity of  
30 care and outcomes: a systematic and critical review. *J Eval Clin Pract* 2010;16(5):947-56.  
31  
32  
33  
34 20 Campbell DJT, Ronksley PE, Hemmelgarn BR, Zhang J, Barnabe C, Tonelli M, et al.  
35 Association of enrolment in primary care networks with diabetes care and outcomes  
36 among First Nations and low-income Albertans. *Open Medicine* 2012;6(4):e155-e165.  
37  
38  
39  
40  
41 21 Martens PJ, Sanderson D, Jebamani L. Health services use of Manitoba First Nations  
42 people: is it related to underlying need? *Can J Public Health* 2005;96(1):S39-S44.  
43  
44  
45  
46  
47 22 Gao S, Manns BJ, Culleton BF, Tonelli M, Quan H, Crowshoe L, et al. Access to health  
48 care among status Aboriginal people with chronic kidney disease. *CMAJ*  
49 2008;179(10):1007.  
50  
51  
52  
53  
54  
55  
56  
57  
58  
59  
60

- 1  
2  
3 23 Jetté N, Quan H, Faris P, Dean S, Li B, Fong A, et al. Health resource use in epilepsy:  
4 significant disparities by age, gender, and aboriginal status. *Epilepsia* 2008;49(4):586-93.  
5  
6  
7  
8 24 Shah BR, Gunraj N, Hux JE. Markers of access to and quality of primary care for  
9 aboriginal people in Ontario, Canada. *Am J Public Health* 2003;93(5):798-802.  
10  
11  
12  
13 25 Lavoie JG, Forget EL, Prakash T, Dahl M, Martens P, O'Neil JD. Have investments in on-  
14 reserve health services and initiatives promoting community control improved First  
15 Nations' health in Manitoba? *Soc Sci Med* 2010;71(4):717-24.  
16  
17  
18  
19  
20  
21 26 Carrière GM, Kumar MB, Sanmartin C. Hospitalization for ambulatory care sensitive  
22 conditions among urban Métis adults. *Health Reports* 2017;28(12):3-11.  
23  
24  
25  
26 27 Booth GL, Hux JE, Fang J, Chan BTB. Time trends and geographic disparities in acute  
27 complications of diabetes in Ontario, Canada. *Diabetes Care* 2005;28(5):1045-50.  
28  
29  
30  
31 28 Anderson I, Crengle S, Leialoha Kamaka M, Chen TH, Palafox N, Jackson-Pulver L.  
32 Indigenous health in Australia, New Zealand, and the Pacific. *Lancet*  
33 2006;367(9524):1775-85.  
34  
35  
36  
37  
38 29 Vallesi S, Wood L, Dimer L, Zada M. "In their own voice" - Incorporating underlying social  
39 determinants into Aboriginal health promotion programs. *Int J Environ Res Public Health*  
40 2018;15(7):1514.  
41  
42  
43  
44  
45  
46 30 Peiris D, Brown A, Cass A. Addressing inequities in access to quality health care for  
47 Indigenous people. *CMAJ* 2008;179(10):985.  
48  
49  
50  
51 31 Cass A, Lowell A, Christie M, Snelling PL, Flack M, Marrnganyin B, et al. Sharing the true  
52 stories: improving communication between Aboriginal patients and healthcare works. *Med*  
53 *J Aust* 2002;176(10):466-70.  
54  
55  
56  
57  
58  
59  
60

- 1  
2  
3 32 Mbuzi V, Fulbrook P, Jessup M. Indigenous peoples' experiences and perceptions of  
4 hospitalisation for acute care: a metasynthesis of qualitative studies. *Int J Nurs Stud*  
5 2017;71:39-49.  
6  
7  
8  
9  
10 33 Cameron BL, Pilar Carmargo Plazas M, Salas AS, Bourque Bearskin L, Hungler K.  
11 Understanding inequalities in access to health care services for Aboriginal people: a call  
12 for nursing action. *Adv Nurs Sci* 2014;37(3):E1-E16.  
13  
14  
15  
16  
17 34 Horrill T, McMillan DE, Schultz ASH, Thompson G. Understanding access to healthcare  
18 among Indigenous peoples: A comparative analysis of biomedical and postcolonial  
19 perspectives. *Nurs Inq* 2018;2018/03/25(3):e12237.  
20  
21  
22  
23  
24  
25  
26  
27  
28  
29  
30  
31  
32  
33  
34  
35  
36  
37  
38  
39  
40  
41  
42  
43  
44  
45  
46  
47  
48  
49  
50  
51  
52  
53  
54  
55  
56  
57  
58  
59  
60

## Table

Table 1. Demographic characteristics of First Nations and other people in Ontario with diabetes, 2014.

| Demographic characteristics |                | Overall        | First Nations                       |                                          | Other people in Ontario |
|-----------------------------|----------------|----------------|-------------------------------------|------------------------------------------|-------------------------|
|                             |                |                | Living in First Nations communities | Living outside First Nations communities |                         |
| N                           |                | 22,952         | 8,869                               | 14,083                                   | 1,357,577               |
| Sex                         | Male           | 10,644 (46.4%) | 4,234 (47.7%)                       | 6,410 (45.5%)                            | 705,528 (52%)           |
|                             | Female         | 12,308 (53.6%) | 4,635 (52.3%)                       | 7,673 (54.5%)                            | 652,049 (48%)           |
| Age (years)                 | 0-19           | 290 (1.3%)     | 111 (1.3%)                          | 179 (1.3%)                               | 11,409 (0.8%)           |
|                             | 20-34          | 1,605 (7%)     | 613 (6.9%)                          | 992 (7%)                                 | 42,235 (3.1%)           |
|                             | 35-49          | 5,621 (24.5%)  | 2,202 (24.8%)                       | 3,419 (24.3%)                            | 188,779 (13.9%)         |
|                             | 50-64          | 9,218 (40.2%)  | 3,532 (39.8%)                       | 5,686 (40.4%)                            | 469,665 (34.6%)         |
|                             | 65-74          | 4,106 (17.9%)  | 1,597 (18%)                         | 2,509 (17.8%)                            | 335,360 (24.7%)         |
| Rurality                    | 75+            | 2,112 (9.2%)   | 814 (9.2%)                          | 1,298 (9.2%)                             | 310,129 (22.8%)         |
|                             | Urban          | 6,644 (28.9%)  | 392 (4.4%)                          | 6,252 (44.4%)                            | 986,217 (72.6%)         |
|                             | Semi-urban     | 4,600 (20%)    | 1,119 (12.6%)                       | 3,481 (24.7%)                            | 261,741 (19.3%)         |
|                             | Rural          | 5,393 (23.5%)  | 2,400 (27.1%)                       | 2,993 (21.3%)                            | 105,371 (7.8%)          |
| Comorbidity                 | Remote/missing | 6,315 (27.5%)  | 4,958 (55.9%)                       | 1,357 (9.6%)                             | 4,248 (0.3%)            |
|                             | Low            | 4,984 (21.7%)  | 2,464 (27.8%)                       | 2,520 (17.9%)                            | 247,756 (18.2%)         |
|                             | Medium         | 8,868 (38.6%)  | 3,481 (39.2%)                       | 5,387 (38.3%)                            | 577,934 (42.6%)         |
|                             | High           | 9,100 (39.6%)  | 2,924 (33%)                         | 6,176 (43.9%)                            | 531,887 (39.2%)         |

1  
2  
3 **Figure legends**  
4  
5  
6

7 Figure 1. Age- and sex-adjusted proportions of people with diabetes who have a regular family  
8 physician, for First Nations people living in and outside of First Nations communities and other  
9 people in Ontario, 2014  
10  
11  
12

13  
14 Figure 2. Age- and sex-adjusted proportions of people with diabetes who received care from a  
15 diabetes specialist, for First Nations people living in and outside of First Nations communities  
16 and other people in Ontario, 2014  
17  
18  
19

20  
21 Figure 3. Age- and sex-adjusted rates of hospital admissions for ambulatory care sensitive  
22 conditions, for First Nations people living in and outside of First Nations communities and other  
23 people in Ontario, with diabetes, 2014  
24  
25  
26

27  
28 Figure 4. Age- and sex-adjusted rates of emergency department visits for hypo- or  
29 hyperglycemia. for First Nations people living in and outside of First Nations communities and  
30 other people in Ontario, with diabetes, 2014  
31  
32  
33  
34  
35  
36  
37  
38  
39  
40  
41  
42  
43  
44  
45  
46  
47  
48  
49  
50  
51  
52  
53  
54  
55  
56  
57  
58  
59  
60



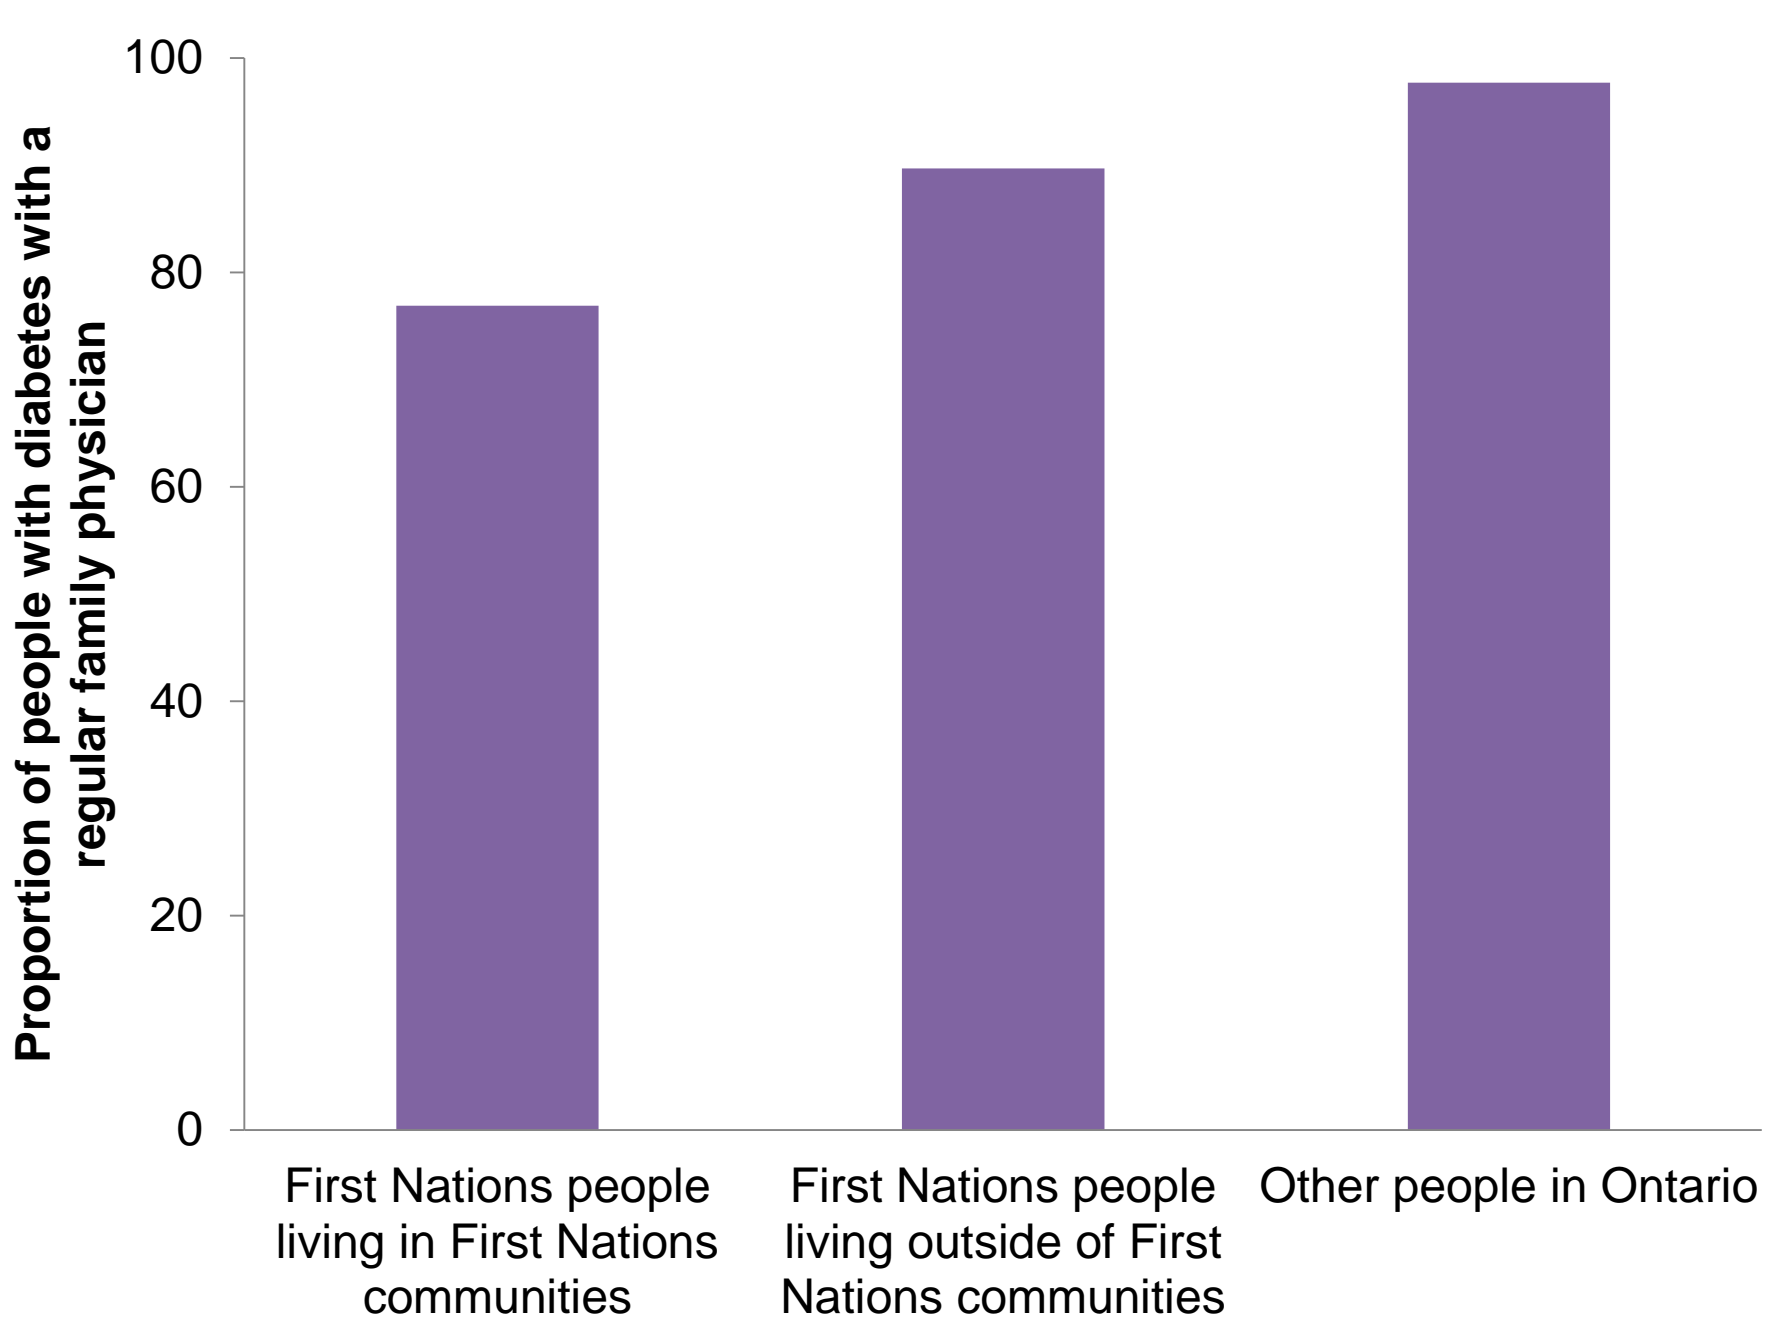

1  
2  
3  
4  
5  
6  
7  
8  
9  
10  
11  
12  
13  
14  
15  
16  
17  
18  
19  
20  
21  
22  
23  
24  
25  
26  
27  
28  
29  
30  
31  
32  
33  
34  
35  
36  
37  
38  
39  
40  
41  
42  
43  
44  
45  
46  
47

1  
2  
3  
4  
5  
6  
7  
8  
9  
10  
11  
12  
13  
14  
15  
16  
17  
18  
19  
20  
21  
22  
23  
24  
25  
26  
27  
28  
29  
30  
31  
32  
33  
34  
35  
36  
37  
38  
39  
40  
41  
42  
43  
44  
45  
46  
47

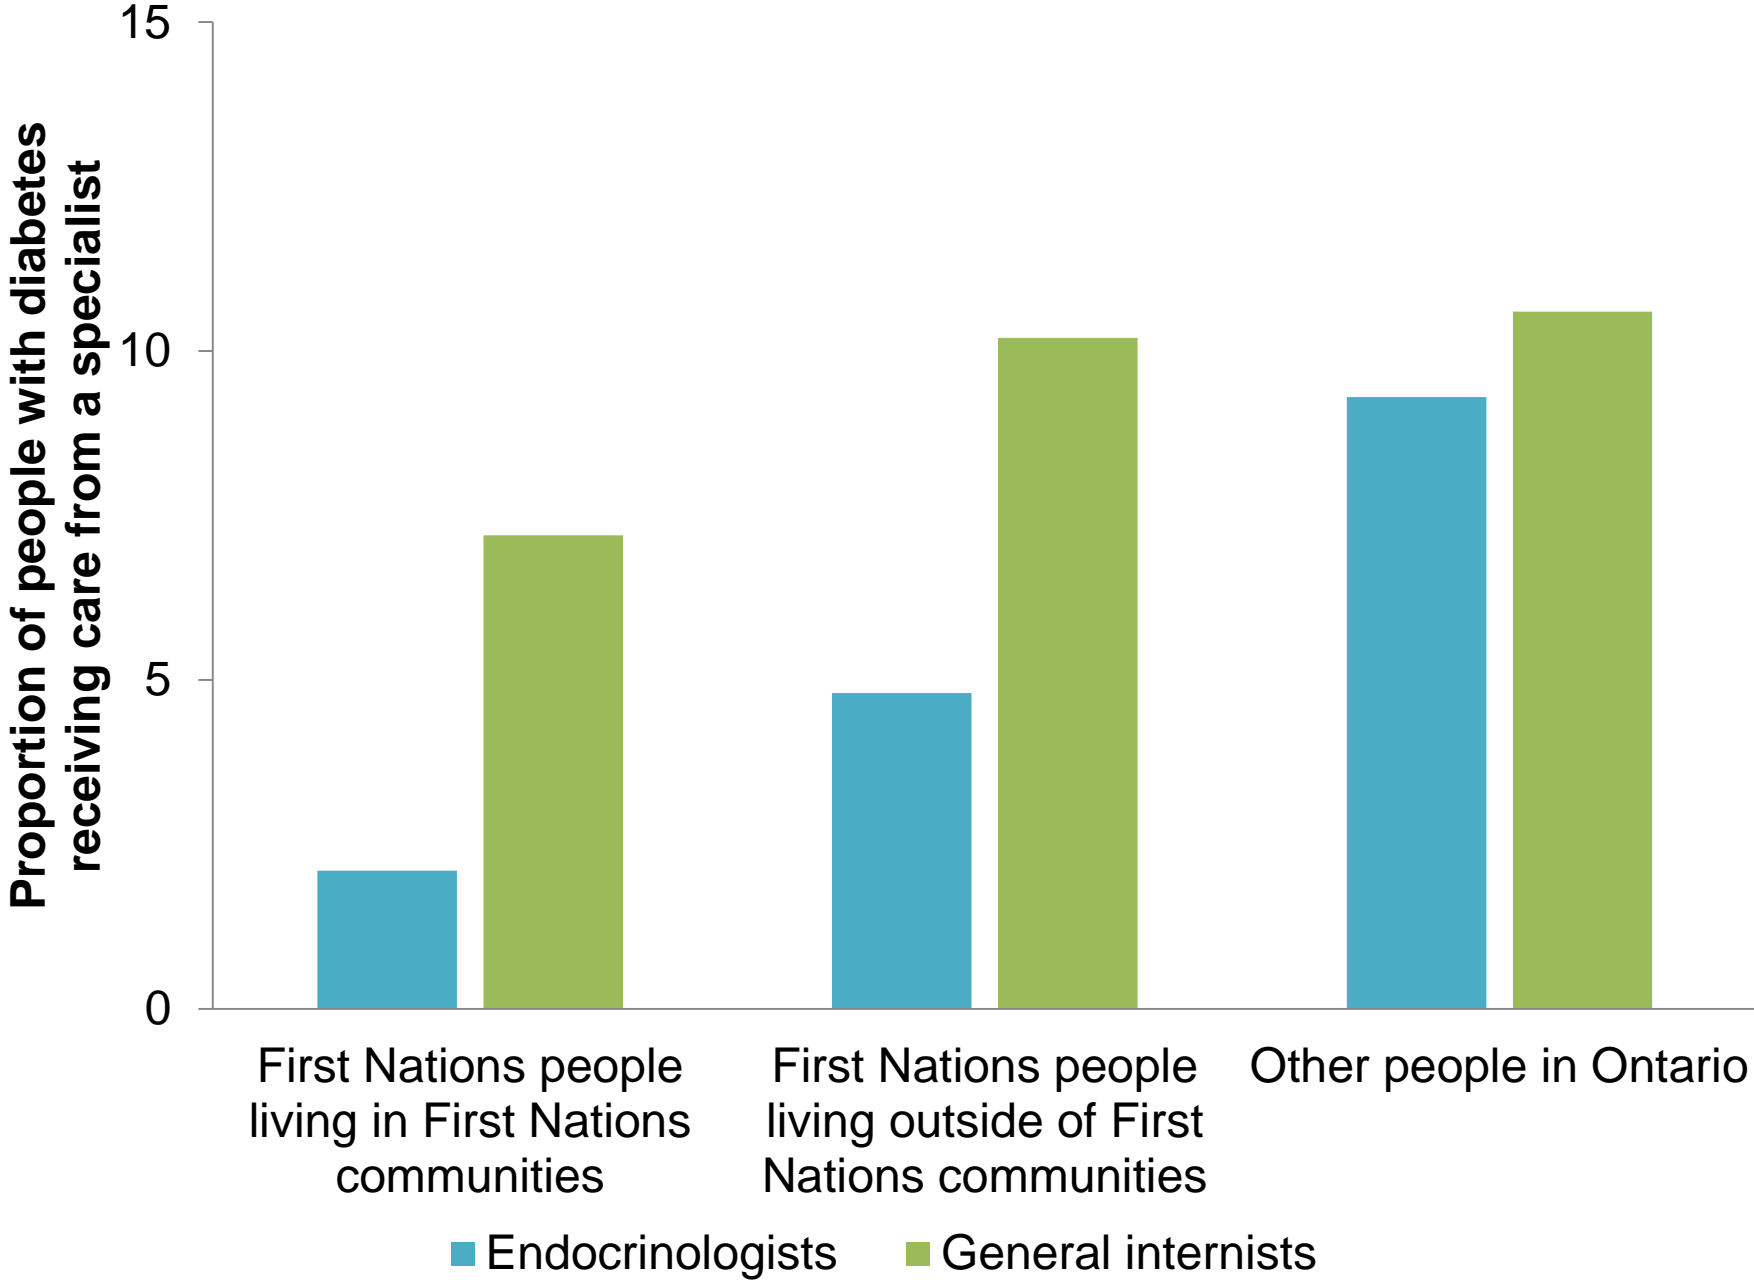

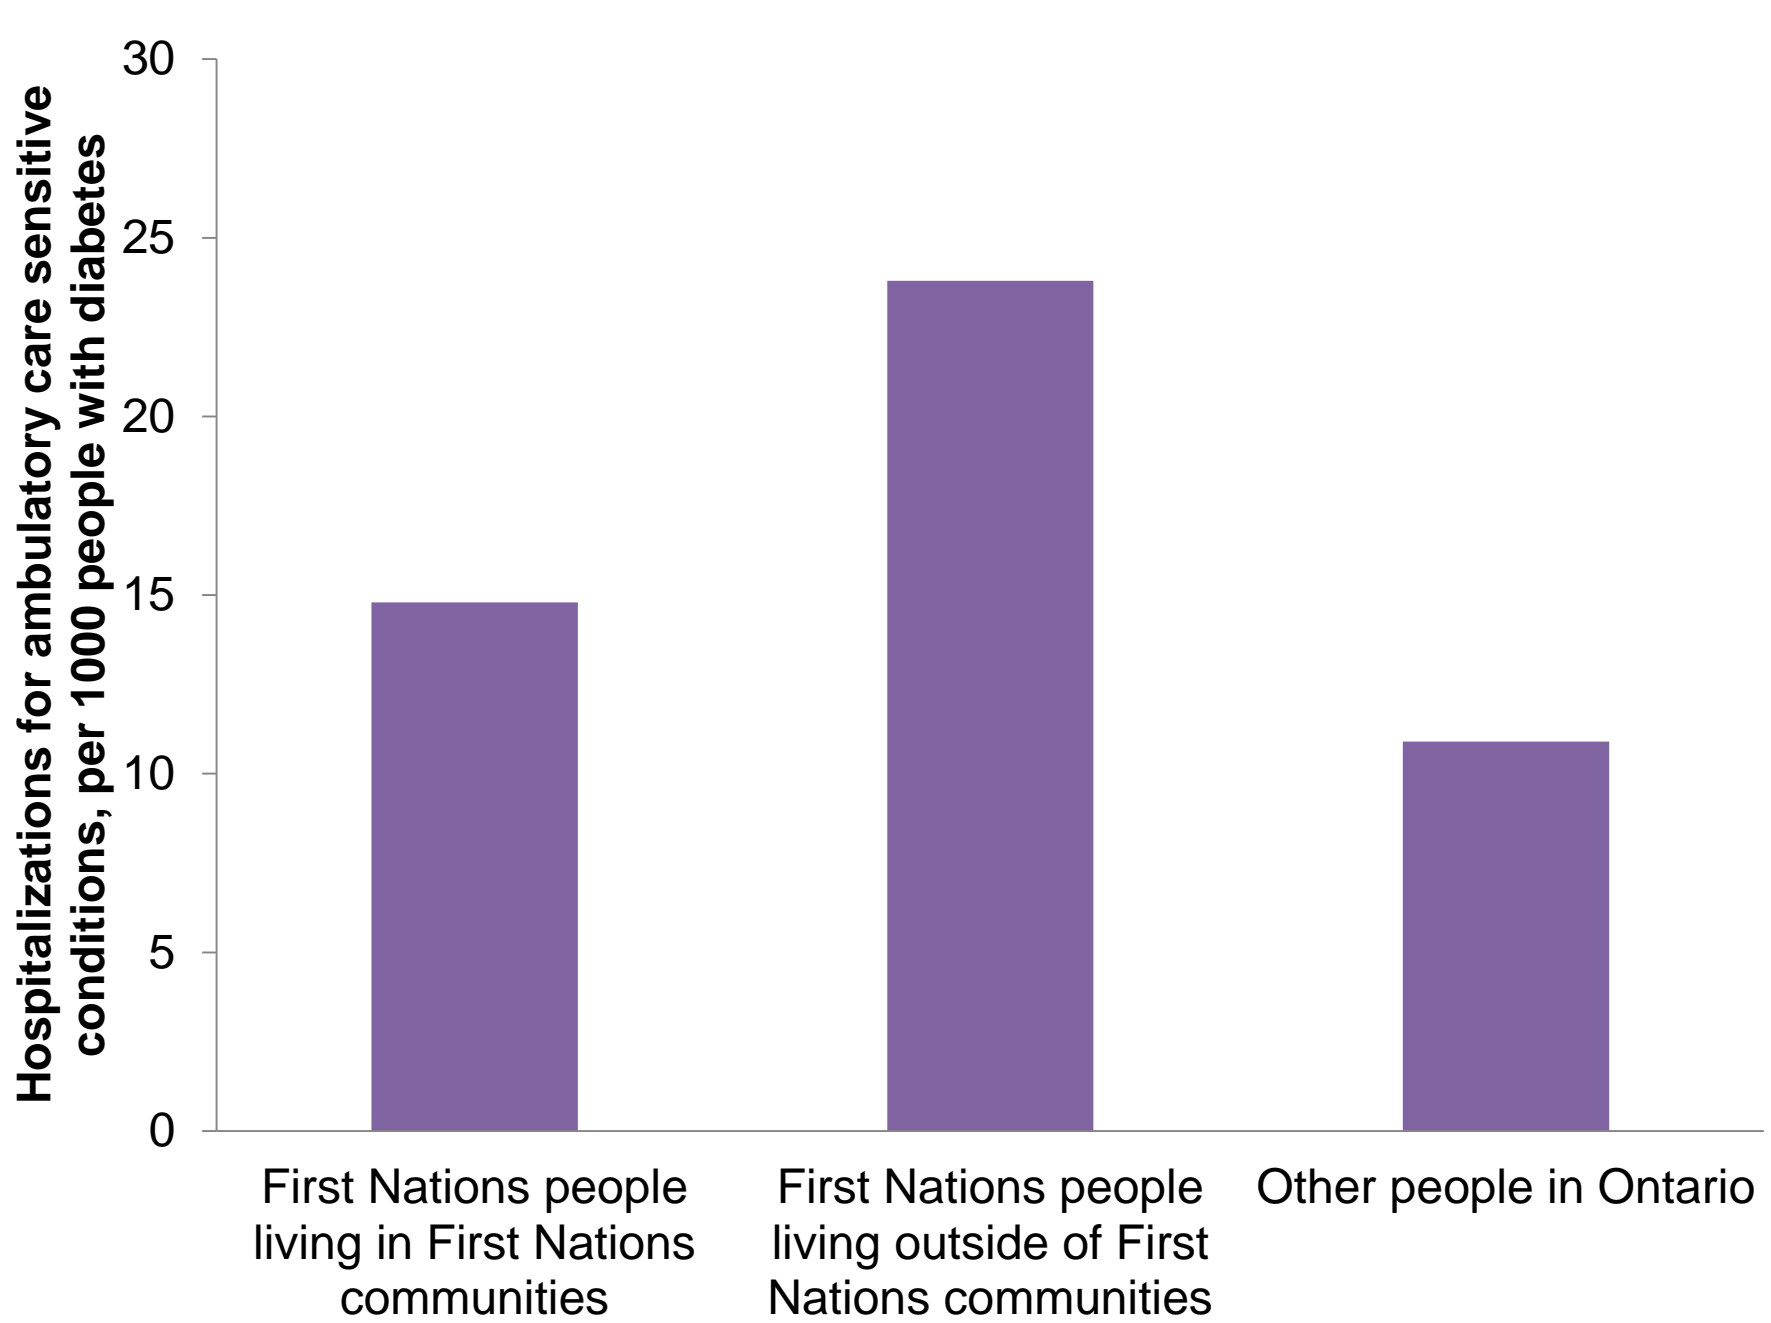

1  
2  
3  
4  
5  
6  
7  
8  
9  
10  
11  
12  
13  
14  
15  
16  
17  
18  
19  
20  
21  
22  
23  
24  
25  
26  
27  
28  
29  
30  
31  
32  
33  
34  
35  
36  
37  
38  
39  
40  
41  
42  
43  
44  
45  
46  
47

1  
2  
3  
4  
5  
6  
7  
8  
9  
10  
11  
12  
13  
14  
15  
16  
17  
18  
19  
20  
21  
22  
23  
24  
25  
26  
27  
28  
29  
30  
31  
32  
33  
34  
35  
36  
37  
38  
39  
40  
41  
42  
43  
44  
45  
46  
47

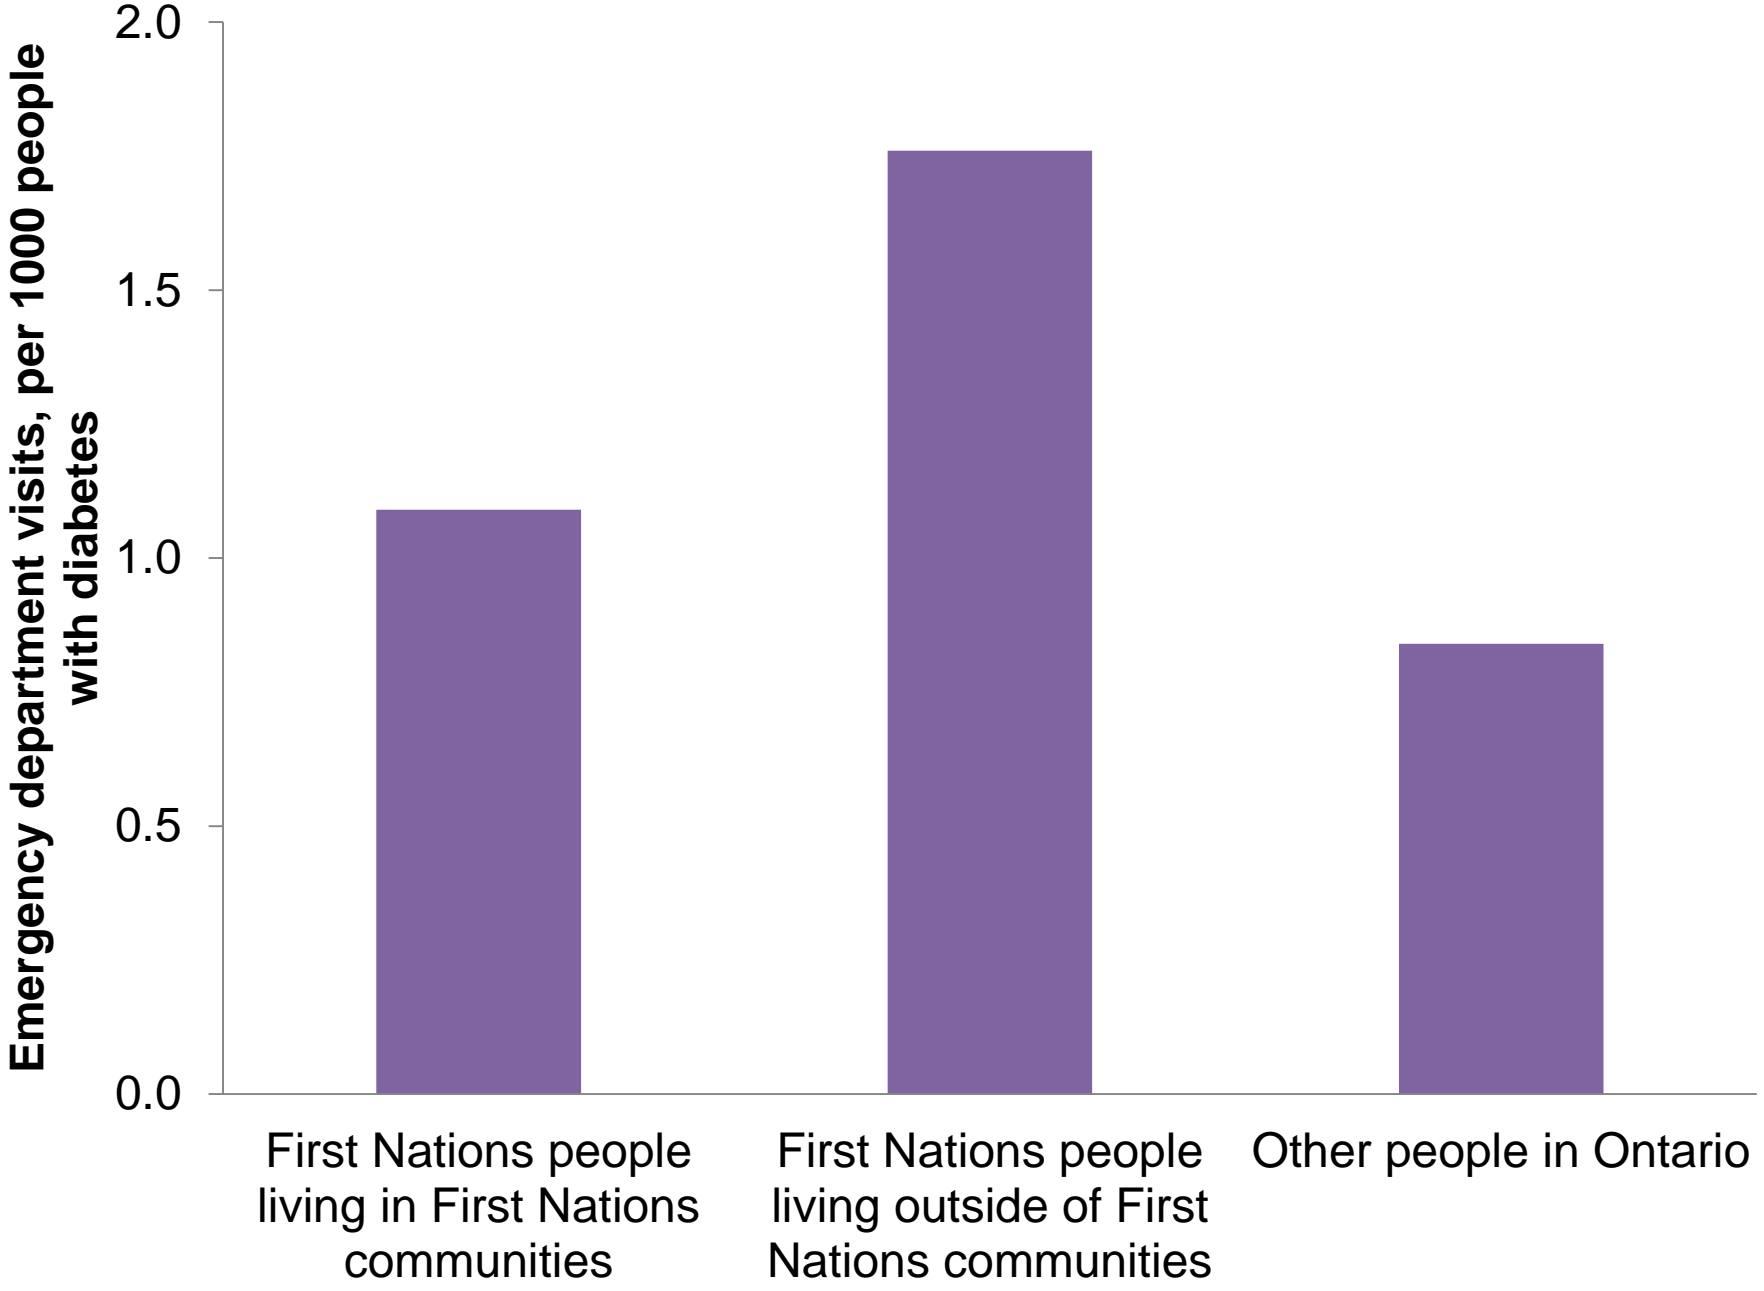

STROBE Statement—Checklist of items that should be included in reports of *cohort studies*

|                              | Item No | Recommendation                                                                                                                                                                                                                                                                                                         | Page No       |
|------------------------------|---------|------------------------------------------------------------------------------------------------------------------------------------------------------------------------------------------------------------------------------------------------------------------------------------------------------------------------|---------------|
| <b>Title and abstract</b>    | 1       | (a) Indicate the study's design with a commonly used term in the title or the abstract<br>(b) Provide in the abstract an informative and balanced summary of what was done and what was found                                                                                                                          | 1<br>3        |
| <b>Introduction</b>          |         |                                                                                                                                                                                                                                                                                                                        |               |
| Background/rationale         | 2       | Explain the scientific background and rationale for the investigation being reported                                                                                                                                                                                                                                   | 4             |
| Objectives                   | 3       | State specific objectives, including any prespecified hypotheses                                                                                                                                                                                                                                                       | 4             |
| <b>Methods</b>               |         |                                                                                                                                                                                                                                                                                                                        |               |
| Study design                 | 4       | Present key elements of study design early in the paper                                                                                                                                                                                                                                                                | 4             |
| Setting                      | 5       | Describe the setting, locations, and relevant dates, including periods of recruitment, exposure, follow-up, and data collection                                                                                                                                                                                        | 4-5           |
| Participants                 | 6       | (a) Give the eligibility criteria, and the sources and methods of selection of participants. Describe methods of follow-up<br>(b) For matched studies, give matching criteria and number of exposed and unexposed                                                                                                      | 4-5           |
| Variables                    | 7       | Clearly define all outcomes, exposures, predictors, potential confounders, and effect modifiers. Give diagnostic criteria, if applicable                                                                                                                                                                               | 5             |
| Data sources/<br>measurement | 8*      | For each variable of interest, give sources of data and details of methods of assessment (measurement). Describe comparability of assessment methods if there is more than one group                                                                                                                                   | 5             |
| Bias                         | 9       | Describe any efforts to address potential sources of bias                                                                                                                                                                                                                                                              | 5             |
| Study size                   | 10      | Explain how the study size was arrived at                                                                                                                                                                                                                                                                              | N/A           |
| Quantitative variables       | 11      | Explain how quantitative variables were handled in the analyses. If applicable, describe which groupings were chosen and why                                                                                                                                                                                           | N/A           |
| Statistical methods          | 12      | (a) Describe all statistical methods, including those used to control for confounding<br>(b) Describe any methods used to examine subgroups and interactions<br>(c) Explain how missing data were addressed<br>(d) If applicable, explain how loss to follow-up was addressed<br>(e) Describe any sensitivity analyses | 5             |
| <b>Results</b>               |         |                                                                                                                                                                                                                                                                                                                        |               |
| Participants                 | 13*     | (a) Report numbers of individuals at each stage of study—eg numbers potentially eligible, examined for eligibility, confirmed eligible, included in the study, completing follow-up, and analysed<br>(b) Give reasons for non-participation at each stage<br>(c) Consider use of a flow diagram                        | N/A           |
| Descriptive data             | 14*     | (a) Give characteristics of study participants (eg demographic, clinical, social) and information on exposures and potential confounders<br>(b) Indicate number of participants with missing data for each variable of interest<br>(c) Summarise follow-up time (eg, average and total amount)                         | Table 1       |
| Outcome data                 | 15*     | Report numbers of outcome events or summary measures over time                                                                                                                                                                                                                                                         | 6,<br>Figures |

|    |                          |    |                                                                                                                                                                                                              |     |
|----|--------------------------|----|--------------------------------------------------------------------------------------------------------------------------------------------------------------------------------------------------------------|-----|
| 1  | Main results             | 16 | (a) Give unadjusted estimates and, if applicable, confounder-adjusted estimates and their precision (eg, 95% confidence interval). Make clear which confounders were adjusted for and why they were included | 6   |
| 2  |                          |    | (b) Report category boundaries when continuous variables were categorized                                                                                                                                    |     |
| 3  |                          |    | (c) If relevant, consider translating estimates of relative risk into absolute risk for a meaningful time period                                                                                             |     |
| 4  |                          |    |                                                                                                                                                                                                              |     |
| 5  |                          |    |                                                                                                                                                                                                              |     |
| 6  |                          |    |                                                                                                                                                                                                              |     |
| 7  |                          |    |                                                                                                                                                                                                              |     |
| 8  |                          |    |                                                                                                                                                                                                              |     |
| 9  | Other analyses           | 17 | Report other analyses done—eg analyses of subgroups and interactions, and sensitivity analyses                                                                                                               | N/A |
| 10 |                          |    |                                                                                                                                                                                                              |     |
| 11 | <b>Discussion</b>        |    |                                                                                                                                                                                                              |     |
| 12 |                          |    |                                                                                                                                                                                                              |     |
| 13 | Key results              | 18 | Summarise key results with reference to study objectives                                                                                                                                                     | 7-8 |
| 14 | Limitations              | 19 | Discuss limitations of the study, taking into account sources of potential bias or imprecision. Discuss both direction and magnitude of any potential bias                                                   | 9   |
| 15 |                          |    |                                                                                                                                                                                                              |     |
| 16 | Interpretation           | 20 | Give a cautious overall interpretation of results considering objectives, limitations, multiplicity of analyses, results from similar studies, and other relevant evidence                                   | 9   |
| 17 |                          |    |                                                                                                                                                                                                              |     |
| 18 |                          |    |                                                                                                                                                                                                              |     |
| 19 | Generalisability         | 21 | Discuss the generalisability (external validity) of the study results                                                                                                                                        | 9   |
| 20 |                          |    |                                                                                                                                                                                                              |     |
| 21 | <b>Other information</b> |    |                                                                                                                                                                                                              |     |
| 22 | Funding                  | 22 | Give the source of funding and the role of the funders for the present study and, if applicable, for the original study on which the present article is based                                                | 2   |
| 23 |                          |    |                                                                                                                                                                                                              |     |
| 24 |                          |    |                                                                                                                                                                                                              |     |

\*Give information separately for exposed and unexposed groups.

**Note:** An Explanation and Elaboration article discusses each checklist item and gives methodological background and published examples of transparent reporting. The STROBE checklist is best used in conjunction with this article (freely available on the Web sites of PLoS Medicine at <http://www.plosmedicine.org/>, Annals of Internal Medicine at <http://www.annals.org/>, and Epidemiology at <http://www.epidem.com/>). Information on the STROBE Initiative is available at <http://www.strobe-statement.org>.
